# Supplementary material
Source: PubMed Central journal article supplement (PMC2584711)
Supplement: 0807920105_ST1.pdf [file 0807920105_ST1.pdf]

**Table S1. Relative abundances of the bacterial groups across all of the hands sampled and within individual categories**

| Phylum or subphylum | No. of hand samples: | All Samples   | Sex           |               | Time since last hand washing |               |               | Dominant vs. nondominant hand |               | Sex and time since last hand washing |                |               |               |               |                |
|---------------------|----------------------|---------------|---------------|---------------|------------------------------|---------------|---------------|-------------------------------|---------------|--------------------------------------|----------------|---------------|---------------|---------------|----------------|
|                     |                      |               | Female        | Male          | <2 hours                     | 2-4 hours     | >4 hours      | Dominant                      | Nondominant   | Female (<2 h)                        | Female (2-4 h) | Female (>4 h) | Male (<2 h)   | Male (2-4 h)  | Male (>4 h)    |
|                     |                      |               |               |               |                              |               |               |                               |               |                                      |                |               |               |               |                |
|                     | No. of sequences:    | 102           | 48            | 54            | 60                           | 30            | 12            | 51                            | 51            | 34                                   | 8              | 6             | 26            | 22            | 6              |
|                     |                      | 331619        | 157331        | 1742088       | 195250                       | 97082         | 39287         | 163692                        | 167927        | 111515                               | 26346          | 19470         | 83735         | 70736         | 19817          |
| Acidobacteria       |                      | 0.124 (0.02)  | 0.137 (0.02)  | 0.108 (0.04)  | 0.140 (0.03)                 | 0.104 (0.04)  | 0.084 (0.02)  | 0.116 (0.03)                  | 0.130 (0.04)  | 0.138 (0.03)                         | 0.138 (0.07)   | 0.134 (0.04)  | 0.142 (0.07)  | 0.087 (0.04)  | 0.035 (0.02)   |
| Actinobacteria      | Actinomycineae       | 0.299 (0.03)  | 0.318 (0.05)  | 0.266 (0.05)  | 0.324 (0.05)                 | 0.264 (0.06)  | 0.197 (0.06)  | 0.282 (0.05)                  | 0.299 (0.05)  | 0.379 (0.06)                         | 0.192 (0.06)   | 0.191 (0.06)  | 0.250 (0.07)  | 0.302 (0.08)  | 0.203 (0.11)   |
|                     | Corynebacterium      | 4.261 (0.41)  | 3.107 (0.38)  | 5.584 (0.70)  | 4.153 (0.63)                 | 5.030 (0.52)  | 3.529 (0.92)  | 4.791 (0.69)                  | 3.946 (0.48)  | 3.184 (0.53)                         | 3.012 (0.51)   | 2.820 (0.98)  | 5.479 (1.28)  | 6.091 (0.64)  | 4.225 (1.63)   |
|                     | Frankineae           | 0.149 (0.02)  | 0.176 (0.02)  | 0.121 (0.02)  | 0.130 (0.02)                 | 0.173 (0.03)  | 0.176 (0.05)  | 0.139 (0.02)                  | 0.162 (0.02)  | 0.142 (0.02)                         | 0.224 (0.05)   | 0.294 (0.07)  | 0.114 (0.03)  | 0.146 (0.04)  | 0.061 (0.04)   |
|                     | Intrasporangiaceae   | 0.274 (0.05)  | 0.380 (0.10)  | 0.152 (0.03)  | 0.198 (0.04)                 | 0.251 (0.06)  | 0.654 (0.41)  | 0.322 (0.10)                  | 0.216 (0.04)  | 0.219 (0.05)                         | 0.405 (0.17)   | 1.315 (0.73)  | 0.170 (0.05)  | 0.170 (0.03)  | 0.005 (0.01)   |
|                     | Propionibacterium    | 31.624 (2.24) | 27.238 (2.70) | 37.624 (3.48) | 27.742 (2.96)                | 34.937 (3.43) | 50.222 (7.30) | 30.022 (2.90)                 | 35.353 (3.53) | 21.639 (2.57)                        | 33.810 (7.30)  | 48.616 (5.90) | 36.087 (5.70) | 35.530 (3.66) | 51.801 (14.12) |
|                     | Other                | 6.117 (0.47)  | 6.764 (0.78)  | 5.462 (0.54)  | 6.354 (0.70)                 | 6.649 (0.73)  | 3.347 (0.56)  | 6.336 (0.73)                  | 5.972 (0.62)  | 6.875 (1.00)                         | 7.621 (1.81)   | 4.449 (0.28)  | 5.641 (0.93)  | 6.139 (0.57)  | 2.265 (0.92)   |
| Bacteroidetes       | Capnocytophaga       | 0.167 (0.02)  | 0.205 (0.04)  | 0.145 (0.02)  | 0.177 (0.04)                 | 0.197 (0.03)  | 0.105 (0.03)  | 0.153 (0.03)                  | 0.200 (0.04)  | 0.235 (0.06)                         | 0.124 (0.03)   | 0.180 (0.02)  | 0.098 (0.03)  | 0.235 (0.05)  | 0.030 (0.02)   |
|                     | Chryseobacterium     | 0.609 (0.17)  | 1.009 (0.34)  | 0.281 (0.04)  | 0.865 (0.29)                 | 0.352 (0.06)  | 0.284 (0.07)  | 0.791 (0.31)                  | 0.514 (0.16)  | 1.287 (0.50)                         | 0.494 (0.14)   | 0.309 (0.08)  | 0.288 (0.07)  | 0.278 (0.05)  | 0.258 (0.13)   |
|                     | Hymenobacter         | 0.174 (0.03)  | 0.232 (0.06)  | 0.110 (0.03)  | 0.147 (0.04)                 | 0.218 (0.07)  | 0.156 (0.05)  | 0.194 (0.05)                  | 0.153 (0.04)  | 0.182 (0.07)                         | 0.407 (0.15)   | 0.196 (0.05)  | 0.100 (0.03)  | 0.119 (0.05)  | 0.117 (0.08)   |
|                     | Porphyromonas        | 0.382 (0.07)  | 0.542 (0.12)  | 0.251 (0.05)  | 0.446 (0.11)                 | 0.358 (0.06)  | 0.243 (0.04)  | 0.391 (0.06)                  | 0.410 (0.12)  | 0.610 (0.18)                         | 0.437 (0.11)   | 0.335 (0.05)  | 0.221 (0.08)  | 0.316 (0.08)  | 0.152 (0.03)   |
|                     | Prevotella           | 1.032 (0.18)  | 1.285 (0.33)  | 0.741 (0.14)  | 1.006 (0.27)                 | 1.071 (0.28)  | 0.871 (0.25)  | 0.753 (0.11)                  | 1.285 (0.35)  | 1.200 (0.44)                         | 1.538 (0.69)   | 1.315 (0.41)  | 0.741 (0.24)  | 0.825 (0.21)  | 0.436 (0.18)   |
|                     | Saprospirales        | 0.139 (0.02)  | 0.172 (0.03)  | 0.098 (0.02)  | 0.120 (0.03)                 | 0.138 (0.03)  | 0.202 (0.08)  | 0.114 (0.02)                  | 0.155 (0.04)  | 0.149 (0.04)                         | 0.170 (0.05)   | 0.320 (0.13)  | 0.081 (0.02)  | 0.121 (0.04)  | 0.086 (0.07)   |
|                     | Other                | 0.466 (0.07)  | 0.645 (0.13)  | 0.284 (0.05)  | 0.475 (0.11)                 | 0.504 (0.09)  | 0.289 (0.06)  | 0.438 (0.10)                  | 0.498 (0.11)  | 0.673 (0.19)                         | 0.710 (0.16)   | 0.351 (0.06)  | 0.205 (0.04)  | 0.396 (0.11)  | 0.228 (0.10)   |
| Alphaproteobacteria | Acetobacterales      | 0.184 (0.03)  | 0.184 (0.03)  | 0.195 (0.06)  | 0.221 (0.05)                 | 0.135 (0.04)  | 0.174 (0.06)  | 0.149 (0.04)                  | 0.235 (0.05)  | 0.167 (0.04)                         | 0.235 (0.09)   | 0.191 (0.04)  | 0.295 (0.11)  | 0.082 (0.02)  | 0.157 (0.12)   |
|                     | Bradyrhizobiales     | 1.180 (0.16)  | 1.468 (0.29)  | 0.966 (0.13)  | 1.222 (0.24)                 | 1.304 (0.23)  | 0.935 (0.27)  | 1.398 (0.29)                  | 1.067 (0.14)  | 1.470 (0.41)                         | 1.611 (0.41)   | 1.181 (0.46)  | 0.883 (0.12)  | 1.143 (0.28)  | 0.694 (0.29)   |
|                     | Caulobacterales      | 0.227 (0.03)  | 0.271 (0.06)  | 0.183 (0.03)  | 0.264 (0.06)                 | 0.172 (0.04)  | 0.184 (0.06)  | 0.279 (0.06)                  | 0.179 (0.03)  | 0.317 (0.09)                         | 0.192 (0.06)   | 0.144 (0.04)  | 0.192 (0.04)  | 0.162 (0.05)  | 0.223 (0.12)   |
|                     | Rhizobiaceae         | 0.106 (0.02)  | 0.125 (0.03)  | 0.077 (0.03)  | 0.101 (0.02)                 | 0.112 (0.05)  | 0.066 (0.02)  | 0.112 (0.03)                  | 0.094 (0.03)  | 0.123 (0.04)                         | 0.143 (0.05)   | 0.103 (0.04)  | 0.071 (0.01)  | 0.096 (0.08)  | 0.030 (0.02)   |
|                     | Rhodobacterales      | 0.392 (0.05)  | 0.406 (0.06)  | 0.386 (0.08)  | 0.350 (0.06)                 | 0.474 (0.11)  | 0.422 (0.14)  | 0.434 (0.08)                  | 0.371 (0.06)  | 0.430 (0.09)                         | 0.273 (0.06)   | 0.510 (0.07)  | 0.240 (0.04)  | 0.580 (0.16)  | 0.334 (0.28)   |
|                     | Sphingomonadales     | 0.604 (0.06)  | 0.767 (0.09)  | 0.428 (0.06)  | 0.587 (0.08)                 | 0.589 (0.09)  | 0.667 (0.15)  | 0.660 (0.09)                  | 0.533 (0.07)  | 0.714 (0.12)                         | 0.837 (0.15)   | 0.954 (0.13)  | 0.413 (0.08)  | 0.459 (0.10)  | 0.385 (0.21)   |
|                     | Other                | 0.324 (0.07)  | 0.329 (0.06)  | 0.330 (0.14)  | 0.303 (0.05)                 | 0.173 (0.03)  | 0.897 (0.62)  | 0.422 (0.14)                  | 0.248 (0.05)  | 0.354 (0.08)                         | 0.289 (0.08)   | 0.258 (0.04)  | 0.234 (0.05)  | 0.112 (0.03)  | 1.525 (1.25)   |
| Betaproteobacteria  | Burkholderiales      | 3.143 (0.28)  | 3.598 (0.39)  | 2.574 (0.39)  | 2.767 (0.22)                 | 3.569 (0.65)  | 3.388 (1.35)  | 3.185 (0.36)                  | 3.015 (0.45)  | 3.257 (0.34)                         | 4.979 (1.35)   | 3.026 (0.44)  | 2.098 (0.20)  | 2.828 (0.61)  | 3.744 (2.78)   |
|                     | Neisseriales         | 2.299 (0.37)  | 2.476 (0.65)  | 2.347 (0.39)  | 1.888 (0.39)                 | 3.001 (0.81)  | 3.511 (1.51)  | 2.231 (0.44)                  | 2.646 (0.64)  | 2.012 (0.64)                         | 4.963 (2.18)   | 0.531 (0.13)  | 1.717 (0.34)  | 1.970 (0.36)  | 6.439 (2.63)   |
|                     | Other                | 0.092 (0.02)  | 0.101 (0.02)  | 0.082 (0.05)  | 0.080 (0.02)                 | 0.121 (0.07)  | 0.066 (0.02)  | 0.100 (0.05)                  | 0.079 (0.02)  | 0.105 (0.03)                         | 0.092 (0.04)   | 0.093 (0.03)  | 0.047 (0.01)  | 0.136 (0.11)  | 0.041 (0.03)   |
| Deltaproteobacteria | Myxococcales         | 0.036 (0.01)  | 0.047 (0.01)  | 0.023 (0.01)  | 0.029 (0.01)                 | 0.044 (0.01)  | 0.041 (0.02)  | 0.031 (0.01)                  | 0.040 (0.01)  | 0.042 (0.02)                         | 0.062 (0.03)   | 0.046 (0.03)  | 0.012 (0.01)  | 0.034 (0.02)  | 0.035 (0.02)   |

|                       |                       |               |               |               |               |               |               |               |               |               |              |               |               |               |               |
|-----------------------|-----------------------|---------------|---------------|---------------|---------------|---------------|---------------|---------------|---------------|---------------|--------------|---------------|---------------|---------------|---------------|
|                       | Other                 | 0.014 (0.00)  | 0.016 (0.01)  | 0.013 (0.00)  | 0.017 (0.01)  | 0.012 (0.00)  | 0.008 (0.00)  | 0.013 (0.01)  | 0.017 (0.00)  | 0.020 (0.01)  | 0.008 (0.00) | 0.010 (0.01)  | 0.014 (0.01)  | 0.014 (0.01)  | 0.005 (0.00)  |
| Epsilonproteobacteria | Other                 | 0.038 (0.01)  | 0.046 (0.01)  | 0.030 (0.01)  | 0.033 (0.01)  | 0.053 (0.02)  | 0.023 (0.01)  | 0.038 (0.01)  | 0.040 (0.01)  | 0.043 (0.01)  | 0.059 (0.03) | 0.041 (0.02)  | 0.020 (0.01)  | 0.050 (0.03)  | 0.005 (0.01)  |
| Gammaproteobacteria   | Enterobacteriales     | 0.566 (0.12)  | 0.901 (0.35)  | 0.224 (0.05)  | 0.532 (0.23)  | 0.271 (0.06)  | 1.508 (1.02)  | 0.787 (0.35)  | 0.354 (0.07)  | 0.799 (0.40)  | 0.289 (0.07) | 2.691 (1.96)  | 0.166 (0.03)  | 0.261 (0.09)  | 0.344 (0.33)  |
|                       | Moraxellaceae         | 2.656 (0.18)  | 3.466 (0.66)  | 1.904 (0.47)  | 2.739 (0.55)  | 2.961 (0.79)  | 1.605 (0.52)  | 2.969 (0.60)  | 2.458 (0.58)  | 4.104 (0.90)  | 2.216 (1.01) | 1.990 (0.86)  | 0.872 (0.13)  | 3.352 (1.10)  | 1.226 (0.63)  |
|                       | Pasteurellaceae       | 1.532 (0.01)  | 1.619 (0.21)  | 1.468 (0.29)  | 1.391 (0.18)  | 1.660 (0.27)  | 2.011 (1.13)  | 1.465 (0.28)  | 1.622 (0.24)  | 1.854 (0.25)  | 1.025 (0.43) | 1.330 (0.63)  | 0.758 (0.18)  | 1.994 (0.32)  | 2.680 (2.20)  |
|                       | Pseudomonadaceae      | 0.741 (0.18)  | 0.981 (0.14)  | 0.535 (0.06)  | 0.907 (0.12)  | 0.518 (0.06)  | 0.631 (0.17)  | 0.839 (0.10)  | 0.693 (0.12)  | 1.194 (0.19)  | 0.416 (0.09) | 0.768 (0.26)  | 0.514 (0.09)  | 0.571 (0.08)  | 0.496 (0.24)  |
|                       | Xanthomonadales       | 0.265 (0.08)  | 0.259 (0.12)  | 0.281 (0.16)  | 0.370 (0.17)  | 0.131 (0.03)  | 0.130 (0.04)  | 0.406 (0.19)  | 0.143 (0.02)  | 0.309 (0.17)  | 0.192 (0.06) | 0.082 (0.02)  | 0.454 (0.32)  | 0.099 (0.02)  | 0.177 (0.08)  |
|                       | Other                 | 0.099 (0.40)  | 0.117 (0.02)  | 0.081 (0.02)  | 0.098 (0.02)  | 0.107 (0.03)  | 0.077 (0.02)  | 0.106 (0.02)  | 0.093 (0.02)  | 0.103 (0.03)  | 0.159 (0.06) | 0.119 (0.03)  | 0.092 (0.02)  | 0.079 (0.03)  | 0.035 (0.02)  |
| Chloroflexi           |                       | 0.050 (0.01)  | 0.064 (0.02)  | 0.037 (0.01)  | 0.051 (0.02)  | 0.044 (0.01)  | 0.064 (0.03)  | 0.059 (0.01)  | 0.042 (0.02)  | 0.063 (0.03)  | 0.049 (0.01) | 0.098 (0.04)  | 0.035 (0.01)  | 0.041 (0.01)  | 0.030 (0.03)  |
| Chloroplasts          |                       | 1.577 (0.22)  | 1.431 (0.27)  | 1.724 (0.35)  | 1.672 (0.29)  | 1.795 (0.46)  | 0.496 (0.15)  | 1.935 (0.40)  | 1.250 (0.21)  | 1.616 (0.39)  | 1.220 (0.31) | 0.711 (0.27)  | 1.748 (0.45)  | 2.097 (0.68)  | 0.284 (0.11)  |
| Cyanobacteria         |                       | 0.058 (0.01)  | 0.076 (0.03)  | 0.035 (0.01)  | 0.056 (0.02)  | 0.054 (0.02)  | 0.056 (0.04)  | 0.042 (0.01)  | 0.070 (0.03)  | 0.078 (0.04)  | 0.054 (0.02) | 0.103 (0.08)  | 0.024 (0.01)  | 0.054 (0.02)  | 0.010 (0.01)  |
| Firmicutes            | Acidaminococcaceae    | 1.059 (0.14)  | 1.044 (0.12)  | 1.083 (0.25)  | 1.135 (0.18)  | 1.096 (0.29)  | 0.598 (0.16)  | 1.068 (0.21)  | 1.071 (0.18)  | 1.091 (0.15)  | 0.944 (0.32) | 0.943 (0.22)  | 1.196 (0.37)  | 1.176 (0.42)  | 0.258 (0.11)  |
|                       | Aerococcaceae         | 1.640 (0.12)  | 2.032 (0.20)  | 1.340 (0.13)  | 2.018 (0.19)  | 1.384 (0.11)  | 0.767 (0.15)  | 1.703 (0.17)  | 1.664 (0.19)  | 2.400 (0.28)  | 1.347 (0.17) | 1.108 (0.14)  | 1.496 (0.20)  | 1.404 (0.15)  | 0.431 (0.19)  |
|                       | Brochothrix           | 0.612 (0.41)  | 1.121 (0.82)  | 0.018 (0.01)  | 0.952 (0.71)  | 0.025 (0.01)  | 0.041 (0.02)  | 0.647 (0.64)  | 0.505 (0.54)  | 1.642 (1.23)  | 0.035 (0.03) | 0.036 (0.02)  | 0.009 (0.00)  | 0.020 (0.01)  | 0.046 (0.03)  |
|                       | Lactobacillaceae      | 4.121 (0.00)  | 6.192 (1.68)  | 1.808 (0.33)  | 4.265 (1.08)  | 4.255 (1.96)  | 1.794 (0.41)  | 4.914 (1.63)  | 2.683 (0.62)  | 5.824 (1.81)  | 9.251 (5.33) | 2.578 (0.49)  | 2.134 (0.62)  | 1.629 (0.29)  | 1.023 (0.53)  |
|                       | Paenibacillaceae      | 0.032 (0.16)  | 0.045 (0.01)  | 0.023 (0.01)  | 0.029 (0.01)  | 0.051 (0.02)  | 0.013 (0.01)  | 0.033 (0.01)  | 0.037 (0.01)  | 0.031 (0.01)  | 0.103 (0.05) | 0.015 (0.01)  | 0.026 (0.01)  | 0.024 (0.01)  | 0.010 (0.01)  |
|                       | Peptostreptococcaceae | 1.236 (0.01)  | 1.657 (0.35)  | 0.793 (0.10)  | 1.176 (0.23)  | 1.501 (0.40)  | 0.692 (0.15)  | 1.463 (0.32)  | 0.986 (0.19)  | 1.477 (0.40)  | 2.572 (1.04) | 1.000 (0.19)  | 0.765 (0.11)  | 0.939 (0.19)  | 0.390 (0.16)  |
|                       | Planococcaceae        | 0.087 (0.18)  | 0.093 (0.02)  | 0.079 (0.01)  | 0.097 (0.02)  | 0.070 (0.02)  | 0.074 (0.03)  | 0.079 (0.01)  | 0.095 (0.02)  | 0.109 (0.03)  | 0.070 (0.03) | 0.041 (0.02)  | 0.081 (0.02)  | 0.069 (0.02)  | 0.106 (0.06)  |
|                       | Staphylococcaceae     | 8.282 (0.01)  | 6.910 (1.21)  | 9.861 (1.53)  | 9.185 (1.56)  | 8.159 (1.23)  | 4.934 (0.85)  | 7.490 (1.06)  | 8.657 (1.64)  | 7.728 (1.72)  | 5.376 (1.63) | 4.882 (0.54)  | 11.178 (2.81) | 9.622 (1.60)  | 4.985 (1.70)  |
|                       | Streptococcaceae      | 17.171 (0.98) | 16.538 (1.49) | 17.518 (2.46) | 20.250 (2.10) | 13.018 (1.65) | 11.320 (4.40) | 17.214 (2.11) | 16.827 (2.05) | 19.953 (1.93) | 8.784 (1.33) | 10.651 (1.55) | 20.656 (4.23) | 15.243 (2.32) | 11.976 (9.04) |
|                       | Other                 | 1.528 (0.87)  | 2.075 (0.29)  | 1.031 (0.13)  | 1.744 (0.26)  | 1.359 (0.14)  | 1.063 (0.36)  | 1.574 (0.23)  | 1.546 (0.24)  | 2.312 (0.41)  | 1.835 (0.28) | 1.098 (0.18)  | 0.968 (0.18)  | 1.109 (0.14)  | 1.028 (0.72)  |
| Fusobacteria          |                       | 0.725 (1.44)  | 0.743 (0.11)  | 0.712 (0.20)  | 0.695 (0.11)  | 0.764 (0.28)  | 0.797 (0.40)  | 0.715 (0.18)  | 0.756 (0.15)  | 0.792 (0.15)  | 0.586 (0.15) | 0.748 (0.31)  | 0.562 (0.17)  | 0.858 (0.42)  | 0.846 (0.77)  |
| Gemmatimonadetes      |                       | 0.053 (0.10)  | 0.071 (0.02)  | 0.032 (0.01)  | 0.057 (0.02)  | 0.052 (0.01)  | 0.018 (0.01)  | 0.055 (0.02)  | 0.047 (0.01)  | 0.078 (0.03)  | 0.073 (0.03) | 0.021 (0.02)  | 0.028 (0.01)  | 0.041 (0.01)  | 0.015 (0.02)  |
| OP10                  |                       | 0.003 (0.01)  | 0.004 (0.00)  | 0.002 (0.00)  | 0.004 (0.00)  | 0.002 (0.00)  | 0.000 (0.00)  | 0.005 (0.00)  | 0.001 (0.00)  | 0.006 (0.01)  | 0.000 (0.00) | 0.000 (0.00)  | 0.001 (0.00)  | 0.003 (0.00)  | 0.000 (0.00)  |
| Planctomycetes        |                       | 0.005 (0.01)  | 0.005 (0.00)  | 0.006 (0.00)  | 0.007 (0.00)  | 0.002 (0.00)  | 0.005 (0.00)  | 0.005 (0.00)  | 0.005 (0.00)  | 0.005 (0.00)  | 0.003 (0.00) | 0.005 (0.01)  | 0.010 (0.00)  | 0.001 (0.00)  | 0.005 (0.00)  |
| Thermi                |                       | 0.295 (0.00)  | 0.203 (0.06)  | 0.363 (0.11)  | 0.157 (0.05)  | 0.465 (0.16)  | 0.442 (0.26)  | 0.271 (0.09)  | 0.305 (0.10)  | 0.111 (0.03)  | 0.162 (0.07) | 0.835 (0.47)  | 0.220 (0.11)  | 0.624 (0.24)  | 0.056 (0.03)  |
| TM7                   |                       | 0.179 (0.06)  | 0.244 (0.05)  | 0.128 (0.04)  | 0.201 (0.05)  | 0.183 (0.06)  | 0.110 (0.05)  | 0.203 (0.05)  | 0.170 (0.04)  | 0.286 (0.08)  | 0.130 (0.05) | 0.211 (0.08)  | 0.086 (0.02)  | 0.211 (0.09)  | 0.010 (0.01)  |
| Verrucomicrobia       |                       | 0.008 (0.03)  | 0.013 (0.01)  | 0.003 (0.00)  | 0.006 (0.00)  | 0.014 (0.01)  | 0.000 (0.00)  | 0.008 (0.01)  | 0.008 (0.00)  | 0.007 (0.00)  | 0.038 (0.02) | 0.000 (0.00)  | 0.006 (0.00)  | 0.001 (0.00)  | 0.000 (0.00)  |
| Other                 |                       | 0.055 (0.00)  | 0.057 (0.01)  | 0.053 (0.01)  | 0.063 (0.01)  | 0.055 (0.02)  | 0.015 (0.01)  | 0.054 (0.01)  | 0.058 (0.01)  | 0.065 (0.02)  | 0.054 (0.03) | 0.021 (0.01)  | 0.062 (0.02)  | 0.055 (0.03)  | 0.010 (0.01)  |

All abundances are reported as percentages of the sequences within each category that match the taxonomic group with one standard error of the mean indicated in parentheses. For this table, we used the Hugenholtz classification scheme against the Greengenes database (10), and the sequences were classified to the level of taxonomic resolution deemed to be most appropriate.
