# Supplementary material
Source: PubMed Central journal article supplement (PMC2584711)
Supplement: 0807920105_ST2.pdf [file 0807920105_ST2.pdf]

**Table S2. Relative abundances of the bacterial groups from the palm surfaces sampled in the smaller-scale study designed to specifically examine the influence of hand washing on bacterial community composition**

|                     |                                   | Sex          |              | Time since hand washing |              |              |              |
|---------------------|-----------------------------------|--------------|--------------|-------------------------|--------------|--------------|--------------|
|                     |                                   | Female       | Male         | 0 hours                 | 2 hours      | 4 hours      | 6 hours      |
|                     | No. of individual swabs collected | 16           | 16           | 8                       | 8            | 8            | 8            |
|                     | No. of sequences                  | 5628         | 7547         | 2971                    | 3116         | 3608         | 3480         |
| Acidobacteria       |                                   | 0.11 (0.05)  | 0.02 (0.02)  | 0.00 (0.00)             | 0.09 (0.09)  | 0.10 (0.05)  | 0.06 (0.04)  |
| Actinobacteria      | Actinomycineae                    | 0.36 (0.14)  | 0.10 (0.06)  | 0.35 (0.26)             | 0.17 (0.09)  | 0.28 (0.15)  | 0.11 (0.06)  |
|                     | Corynebacterium                   | 2.67 (0.50)  | 3.58 (0.78)  | 5.91 (1.25)             | 2.43 (0.48)  | 2.40 (0.37)  | 1.75 (0.63)  |
|                     | Frankineae                        | 0.35 (0.11)  | 0.07 (0.04)  | 0.18 (0.11)             | 0.40 (0.20)  | 0.14 (0.07)  | 0.12 (0.06)  |
|                     | Intrasporangiaceae                | 0.19 (0.13)  | 0.24 (0.14)  | 0.31 (0.28)             | 0.31 (0.26)  | 0.15 (0.07)  | 0.09 (0.07)  |
|                     | Propriobacterium                  | 57.85 (5.81) | 65.56 (5.08) | 38.34 (5.18)            | 68.06 (6.79) | 70.64 (5.65) | 69.79 (7.37) |
|                     | Other                             | 2.52 (0.39)  | 1.68 (0.30)  | 2.89 (0.47)             | 1.76 (0.45)  | 1.62 (0.44)  | 2.12 (0.63)  |
| Bacteroidetes       | Capnocytophaga                    | 0.19 (0.07)  | 0.05 (0.03)  | 0.11 (0.07)             | 0.09 (0.06)  | 0.16 (0.12)  | 0.13 (0.05)  |
|                     | Chryseobacterium                  | 0.00 (0.00)  | 0.00 (0.00)  | 0.00 (0.00)             | 0.00 (0.00)  | 0.00 (0.00)  | 0.00 (0.00)  |
|                     | Hymenobacter                      | 0.33 (0.11)  | 0.10 (0.05)  | 0.18 (0.12)             | 0.26 (0.09)  | 0.11 (0.09)  | 0.31 (0.20)  |
|                     | Porphyromonas                     | 0.41 (0.16)  | 0.25 (0.17)  | 0.17 (0.08)             | 0.39 (0.27)  | 0.22 (0.16)  | 0.56 (0.34)  |
|                     | Prevotella                        | 0.00 (0.00)  | 0.00 (0.00)  | 0.00 (0.00)             | 0.00 (0.00)  | 0.00 (0.00)  | 0.00 (0.00)  |
|                     | Saprosirales                      | 0.41 (0.23)  | 0.03 (0.02)  | 0.51 (0.46)             | 0.18 (0.08)  | 0.02 (0.02)  | 0.15 (0.08)  |
|                     | Other                             | 1.09 (0.29)  | 0.84 (0.28)  | 2.40 (0.34)             | 0.55 (0.22)  | 0.59 (0.34)  | 0.31 (0.14)  |
| Alphaproteobacteria | Acetobacterales                   | 0.10 (0.05)  | 0.14 (0.06)  | 0.24 (0.13)             | 0.07 (0.07)  | 0.06 (0.04)  | 0.11 (0.06)  |
|                     | Bradyrhizobiales                  | 1.56 (0.49)  | 0.91 (0.26)  | 2.45 (0.68)             | 0.68 (0.25)  | 0.99 (0.62)  | 0.81 (0.42)  |
|                     | Caulobacterales                   | 0.21 (0.10)  | 0.13 (0.06)  | 0.47 (0.18)             | 0.06 (0.04)  | 0.03 (0.03)  | 0.13 (0.06)  |
|                     | Rhizobiaceae                      | 0.04 (0.02)  | 0.07 (0.04)  | 0.20 (0.08)             | 0.00 (0.00)  | 0.00 (0.00)  | 0.02 (0.02)  |
|                     | Rhodobacterales                   | 0.23 (0.10)  | 0.16 (0.07)  | 0.08 (0.04)             | 0.32 (0.19)  | 0.10 (0.07)  | 0.29 (0.10)  |
|                     | Sphingomonadales                  | 0.57 (0.19)  | 0.50 (0.14)  | 0.99 (0.32)             | 0.48 (0.17)  | 0.31 (0.14)  | 0.38 (0.20)  |
|                     | Other                             | 0.27 (0.08)  | 0.03 (0.02)  | 0.13 (0.10)             | 0.29 (0.12)  | 0.08 (0.06)  | 0.10 (0.08)  |
| Betaproteobacteria  | Burkholderiales                   | 3.41 (1.22)  | 2.00 (0.75)  | 8.07 (1.82)             | 1.15 (0.45)  | 0.80 (0.20)  | 0.79 (0.23)  |

|                       |                       |             |             |             |             |             |             |
|-----------------------|-----------------------|-------------|-------------|-------------|-------------|-------------|-------------|
|                       | Neisseriales          | 0.95 (0.28) | 0.51 (0.15) | 0.63 (0.26) | 0.79 (0.44) | 0.93 (0.36) | 0.58 (0.26) |
|                       | Other                 | 0.25 (0.14) | 0.20 (0.08) | 0.64 (0.25) | 0.15 (0.10) | 0.02 (0.02) | 0.08 (0.08) |
| Deltaproteobacteria   | Myxococcales          | 0.12 (0.08) | 0.00 (0.00) | 0.19 (0.16) | 0.04 (0.04) | 0.00 (0.00) | 0.00 (0.00) |
|                       | Other                 | 0.00 (0.00) | 0.00 (0.00) | 0.00 (0.00) | 0.00 (0.00) | 0.00 (0.00) | 0.00 (0.00) |
| Epsilonproteobacteria | Other                 | 0.37 (0.30) | 0.00 (0.00) | 0.10 (0.10) | 0.05 (0.05) | 0.60 (0.60) | 0.00 (0.00) |
| Gammaproteobacteria   | Enterobacteriales     | 1.15 (0.55) | 0.26 (0.19) | 0.41 (0.29) | 1.44 (0.98) | 0.64 (0.59) | 0.32 (0.24) |
|                       | Moraxellaceae         | 2.67 (1.00) | 3.22 (0.97) | 8.24 (1.59) | 1.10 (0.33) | 1.42 (0.42) | 1.02 (0.48) |
|                       | Pasteurellaceae       | 1.87 (0.48) | 1.37 (0.45) | 1.37 (0.48) | 1.20 (0.62) | 1.60 (0.70) | 2.30 (0.82) |
|                       | Pseudomonadaceae      | 0.94 (0.34) | 1.85 (0.78) | 2.38 (0.58) | 2.00 (1.54) | 0.89 (0.29) | 0.29 (0.17) |
|                       | Xanthomonadales       | 0.10 (0.06) | 0.09 (0.07) | 0.28 (0.15) | 0.10 (0.07) | 0.00 (0.00) | 0.00 (0.00) |
|                       | Other                 | 0.19 (0.11) | 0.07 (0.04) | 0.07 (0.05) | 0.32 (0.22) | 0.09 (0.07) | 0.04 (0.04) |
| Chloroflexi           |                       | 0.01 (0.01) | 0.03 (0.02) | 0.03 (0.03) | 0.00 (0.00) | 0.03 (0.03) | 0.03 (0.03) |
| Chloroplasts          |                       | 2.01 (0.49) | 2.96 (1.06) | 1.11 (0.56) | 2.89 (1.35) | 3.59 (1.42) | 2.36 (1.17) |
| Cyanobacteria         |                       | 0.11 (0.08) | 0.00 (0.00) | 0.16 (0.16) | 0.00 (0.00) | 0.06 (0.06) | 0.00 (0.00) |
| Firmicutes            | Acidaminococcaceae    | 0.71 (0.15) | 0.26 (0.10) | 0.66 (0.22) | 0.47 (0.20) | 0.50 (0.20) | 0.31 (0.18) |
|                       | Aerococcaceae         | 0.40 (0.14) | 0.30 (0.08) | 0.52 (0.19) | 0.19 (0.13) | 0.27 (0.11) | 0.43 (0.19) |
|                       | Brochothrix           | 0.00 (0.00) | 0.00 (0.00) | 0.00 (0.00) | 0.00 (0.00) | 0.00 (0.00) | 0.00 (0.00) |
|                       | Lactobacillaceae      | 2.69 (0.93) | 0.88 (0.26) | 2.03 (0.70) | 2.62 (1.80) | 0.90 (0.51) | 1.59 (0.50) |
|                       | Peptostreptococcaceae | 1.21 (0.35) | 0.55 (0.21) | 1.89 (0.56) | 0.52 (0.33) | 0.44 (0.18) | 0.66 (0.34) |
|                       | Staphylococcaceae     | 3.49 (0.61) | 2.84 (0.73) | 6.27 (1.25) | 2.47 (0.38) | 2.15 (0.37) | 1.78 (0.46) |
|                       | Streptococcaceae      | 5.27 (0.78) | 6.87 (1.57) | 6.28 (1.83) | 4.22 (1.46) | 5.18 (0.98) | 8.60 (2.36) |
|                       | Other                 | 1.16 (0.20) | 0.63 (0.15) | 1.11 (0.21) | 0.89 (0.25) | 0.99 (0.21) | 0.58 (0.36) |
| Fusobacteria          |                       | 0.40 (0.14) | 0.40 (0.11) | 0.67 (0.18) | 0.36 (0.23) | 0.22 (0.07) | 0.36 (0.20) |
| Gemmatimonadetes      |                       | 0.03 (0.03) | 0.00 (0.00) | 0.05 (0.05) | 0.00 (0.00) | 0.00 (0.00) | 0.00 (0.00) |
| Thermi                |                       | 0.85 (0.38) | 0.08 (0.04) | 0.84 (0.73) | 0.29 (0.18) | 0.23 (0.20) | 0.50 (0.26) |
| TM7                   |                       | 0.07 (0.03) | 0.06 (0.03) | 0.07 (0.05) | 0.03 (0.03) | 0.10 (0.05) | 0.05 (0.04) |
| Other                 |                       | 0.11 (0.08) | 0.11 (0.07) | 0.00 (0.00) | 0.13 (0.13) | 0.32 (0.14) | 0.00 (0.00) |

All of the abundances are reported as percentages of the sequences within each category that match the taxonomic group with one standard error of the mean indicated in parentheses. For this table, we used the Hugenholtz classification scheme against the Greengenes database (10), and the sequences were classified to the level of taxonomic resolution deemed to be most appropriate. For this study, we swabbed both left and right hands together from 4 men and 4 women immediately after hand washing (time 0) and every 2 h over a 6-h period.
