# Supplementary material
Source: PubMed Central journal article supplement (PMC2584711)
Supplement: 0807920105_ST3.pdf [file 0807920105_ST3.pdf]

**Table S3. List of the 102 12-bp error-correcting Golay barcodes used to tag each PCR product analyzed as part of the larger study**

|               |              |               |
|---------------|--------------|---------------|
| AACGCACGCTAG  | ACGTGAGAGAAT | ACGCTATCTGGA  |
| ACACTGTTTCATG | ACTGACAGCCAT | ACTATTGTACAG  |
| ACCAGACGATGC  | AGCGACTGTGCA | AGAACACGTCTC  |
| ACGCTCATGGAT  | AGTACGCTCGAG | AGTGAGAGAAGC  |
| ACTCACGGTATG  | AATCGTGACTCG | ATACTATTGCGC  |
| AGACCGTCAGAC  | ACGAGTGCTATC | ATGCACTGGCGA  |
| AGCACGAGCCTA  | ACTGATCCTAGT | CAGATACACTTC  |
| ACAGACCACTCA  | AGAGTCCTGAGC | CAGTGTCCAGGAC |
| ACCAGCGACTAG  | AGCGAGCTATCT | AGTGCGATGCGT  |
| ACGGATCGTCAG  | AGTACTGCAGGC | ATACTCACTCAG  |
| AGCTTGACAGCT  | ACACACTATGGC | ATCGCTCGAGGA  |
| AACTGTGCGTAC  | ACGATGCGACCA | ATGCAGCTCAGT  |
| ACCGCAGAGTCA  | ACGTTAGCACAC | ATTCTGTGAGCG  |
| ACGGTGAGTGTC  | ACTGTACGCGTA | CACGGACTATAC  |
| ACTCGATTTCGAT | AGATACACGCGC | CAGATCGGATCG  |
| AGACTGCGTACT  | AGCGCTGATGTG | CATACCAGTAGC  |
| AGCAGTCGCGAT  | ACACATGTCTAC | AGTGGATGCTCT  |
| AGGACGCACTGT  | ACATGATCGTTC | ATAGCTCCATAC  |
| AAGAGATGTCGA  | ACGCAACTGCTA | ATCGTACAACCT  |
| ACAGCAGTGGTC  | ACTGTGCAAGCT | CAACACGCACGA  |
| ACGTAICTCAGTG | AGCGTAGGTCGT | CACGTGATGGA   |
| ACTCGCACAGGA  | ACACGAGCCACA | CAGCACTAAGCG  |
| AGAGAGCAAGTG  | ACATGTCACGTG | CATAGACGTTCC  |
| AGCATATGAGAG  | ACGCGATACTGG | AGTGTCCAGGTG  |
| AGGCTACACGAC  | ACTACGTGTGGT | ATAGGCGATCTC  |
| AAGCTGCAGTCG  | ACTGTGACTTCA | ATCTACTACACG  |
| ACAGCTAGCTTG  | AGATCTCTGCAT | ATGCGTAGTGCG  |
| ACCTGTCTCTCT  | AGCTATCCACGA | CATAGCGAGTTC  |
| ACGTCTGTAGCA  | AGTCCATAGCTG | AGTGTTTCGATCG |
| AGAGCAAGAGCA  | ACACGGTGTCTA | ATATCGCTACTG  |
| AGCCATACTGAC  | ACATTCAGCGCA | ATCTCTGGCATA  |
| AGGTGTGATCGC  | ACTTGTAGCAGC | ATGGATACGCTC  |
| AATCAGTCTCGT  | AGATGTTCTGCT | CAACTCATCGTA  |
| ACGACGTCTTAG  | AGCTCCATACAG | CACTACTGTTGA  |
